# Supplementary material for: Structural insights of SIR2rp3 proteins as promising biotargets to fight against Chagas disease and leishmaniasis
Source: Royal Society of Chemistry journal article supplement (doi:10.1039/c3mb70180h), 2013-05-29
Supplement: c3mb70180h.pdf [file c3mb70180h.pdf]

# Supplementary Material for: Structural insights of SIR2rp3 proteins as promising biotargets to fight against Chagas disease and Leishmaniasis

*Lionel Sacconay,<sup>\*a</sup> Despina Smirilis,<sup>b</sup> Emerson F. Queiroz,<sup>a</sup> Jean L. Wolfender,<sup>a</sup> Milena B. P. Soares,<sup>c,d</sup> Pierre A. Carrupt<sup>a</sup> and Alessandra Nurisso<sup>a</sup>*

<sup>a</sup> Pharmacochemistry and Phytochemistry & Bioactive Natural Products, School of Pharmaceutical Sciences, University of Geneva, University of Lausanne, Quai Ernest-Ansermet 30, CH-1211 Geneva 4, Switzerland

<sup>b</sup> Laboratory of Molecular Parasitology, Microbiology Dpt, Hellenic Pasteur Institute, 127 Vasilissis Sofias avenue, 11521 Athens, Greece

<sup>c</sup> Centro de Pesquisas Gonçalo Moniz, Fundação Oswaldo Cruz, Rua Waldemar Falcão, 121, Candeal 40296710, Salvador, BA, Brazil

<sup>d</sup> Hospital São Rafael, Av. São Rafael, 2152, São Marcos 41253190, Salvador, BA, Brazil

The present article describes how three-dimensional models of parasitic NAD<sup>+</sup>-dependent deacetylases SIR2rp3 were generated, refined and validated through *in silico* techniques. This supplementary document contains figures and tables that aim at supporting the results reported in the main text. Those data were excluded from the main text for concision and clarity of presentation.

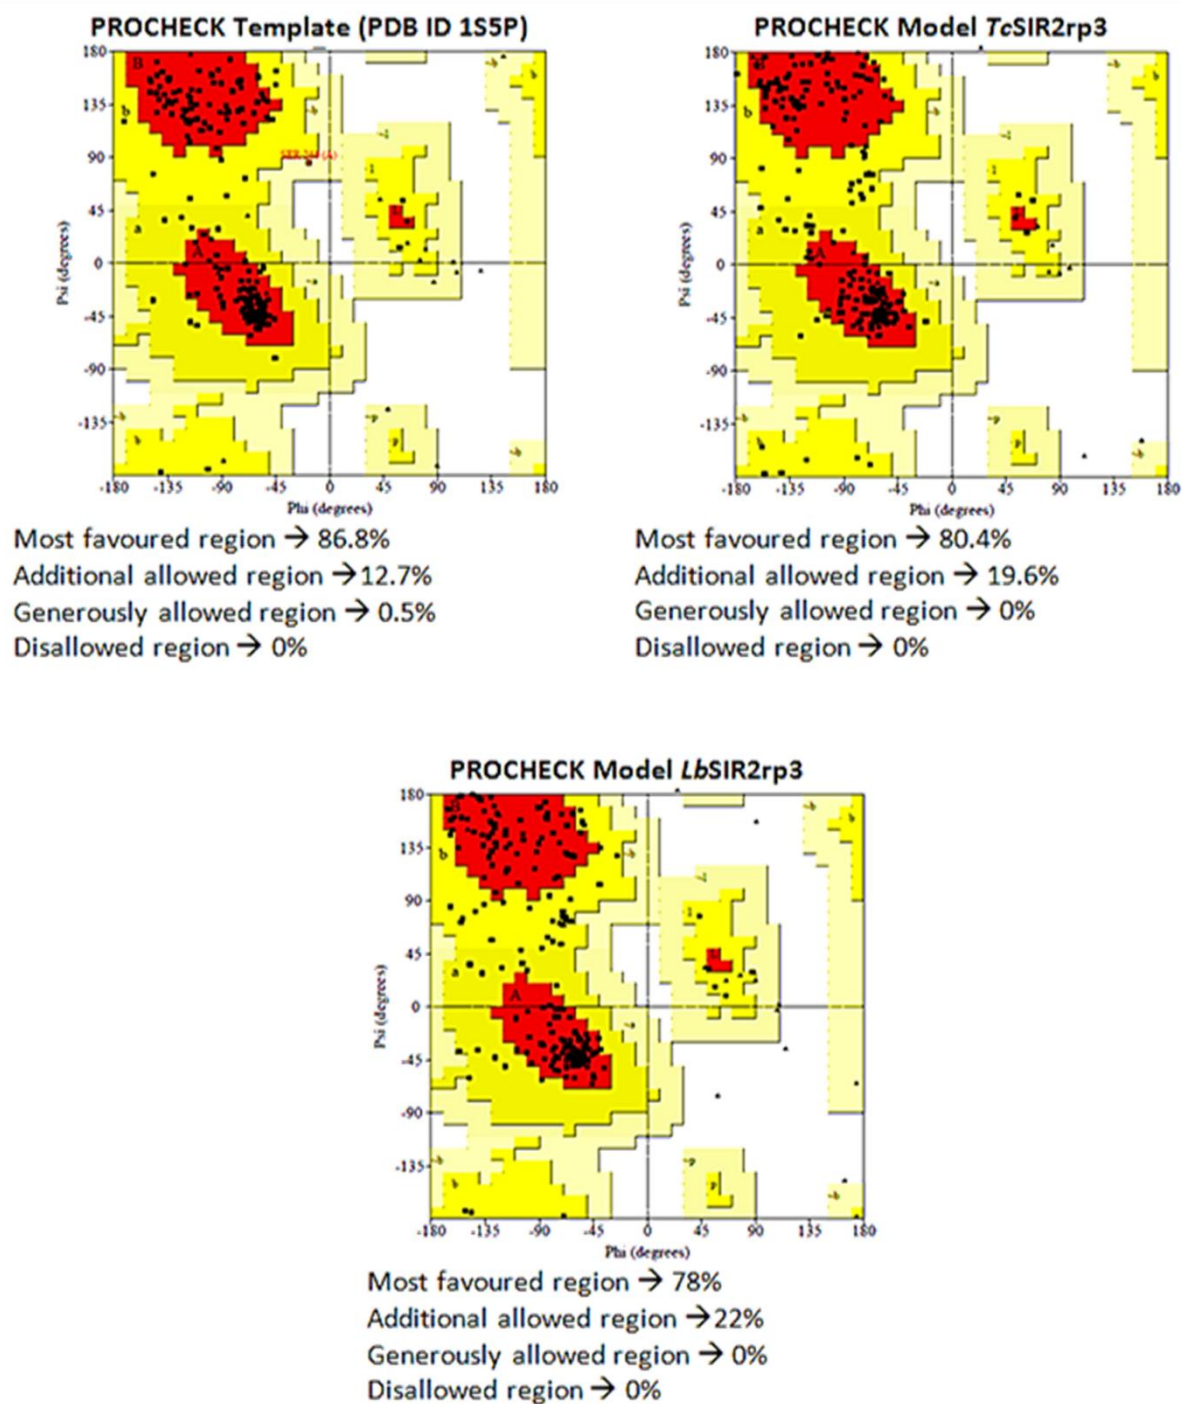

**Figure S1.** Ramachandran plots of *E. coli* sirtuin (template, PDB code 1S5P), *TcSIR2rp3* and *LbSIR2rp3* homology models.

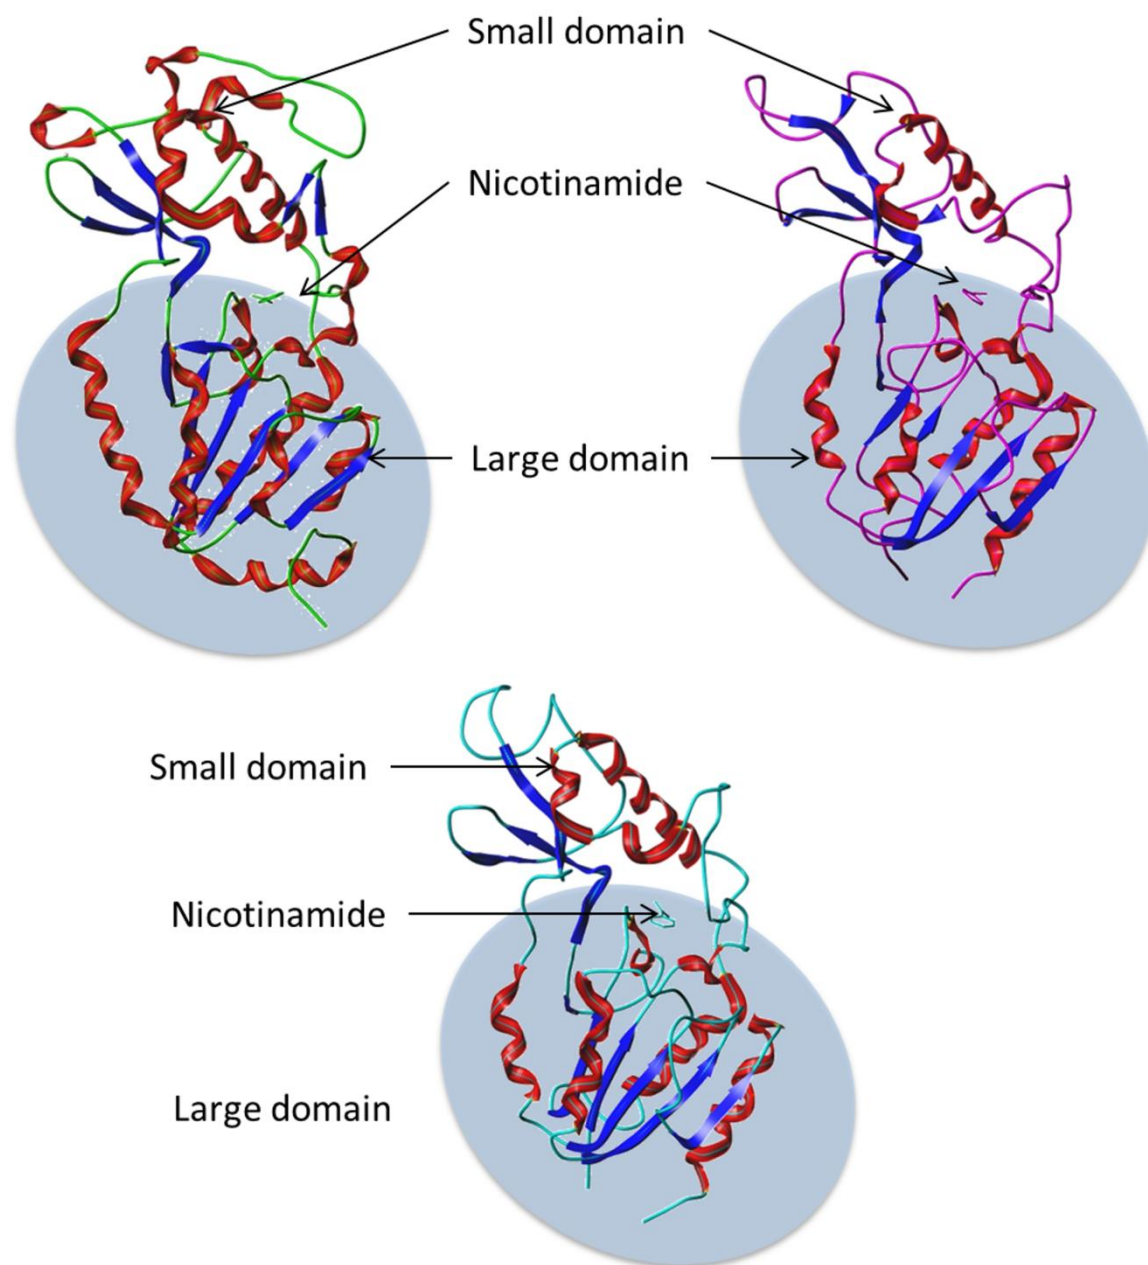

**Figure S2.** 3D structure of hSIRT5 (green), *TcSIR2rp3* (magenta) and *LbSIR2rp3* (cyan). Secondary structure elements are highlighted ( $\alpha$  helices in red;  $\beta$  sheets in blue). The blue circles enclose the large domain. Small domain and catalytic site are also indicated with black arrows. The crystallographic nicotinamide (PDB code 1YC5) is reported in all proteins, represented as capped sticks.

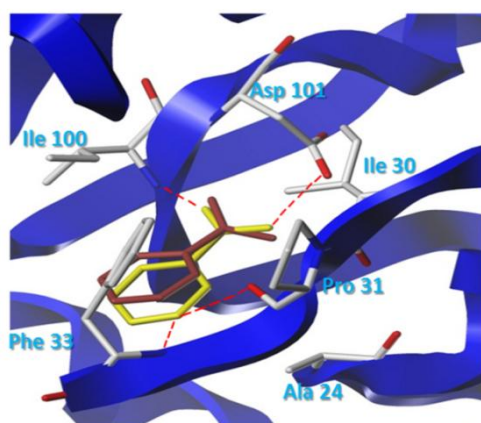

**Figure S3.** Nicotinamide docked into *T. maritima* (PDB code 1YC5) active pockets. Best-overall poses are represented in brown capped sticks whereas the proteins are represented with blue ribbons. Key amino acids interacting with the ligand are reported in capped sticks, color-coded according to atom types. The crystallographic pose of nicotinamide in *T. maritima* is shown in yellow. Hydrogen bonds are also represented as red dashes.

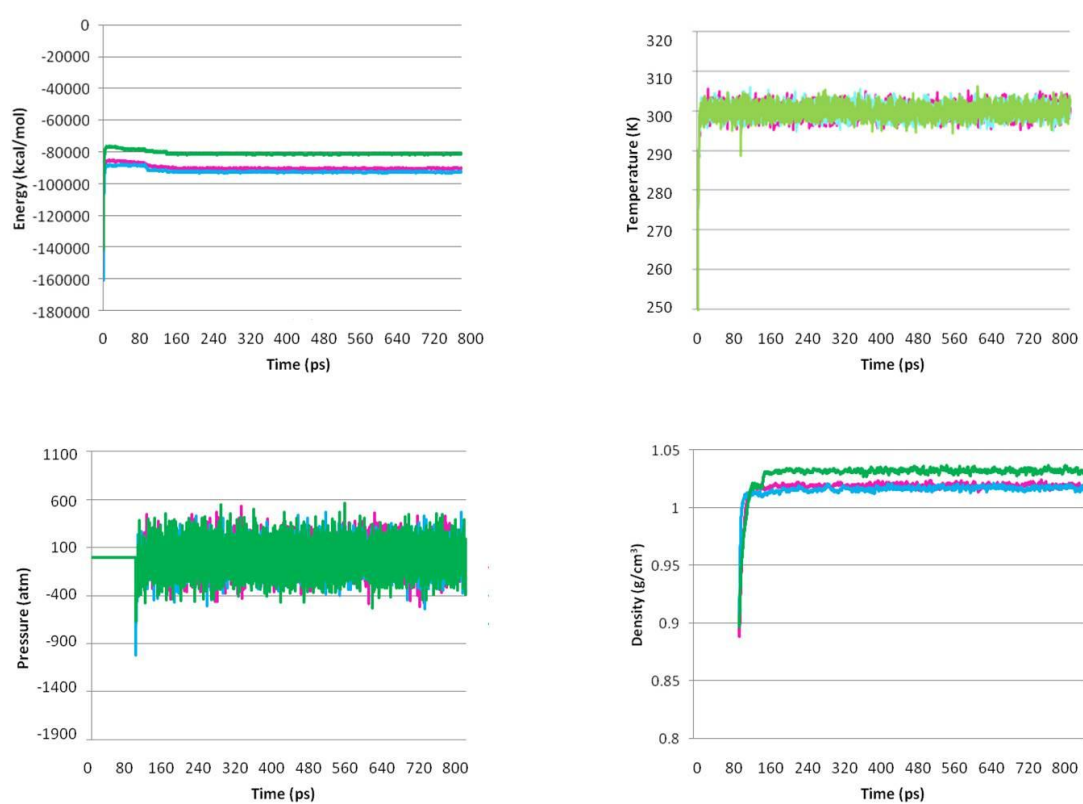

**Figure S4.** Plots against time for the heating and equilibration phases of the total energies (A), temperature (B), pressure (C) and density (D) in nicotinamide-protein complex simulations. hSIRT5 (green), TcSIR2rp3 (magenta), LbSIR2rp3 (cyan).

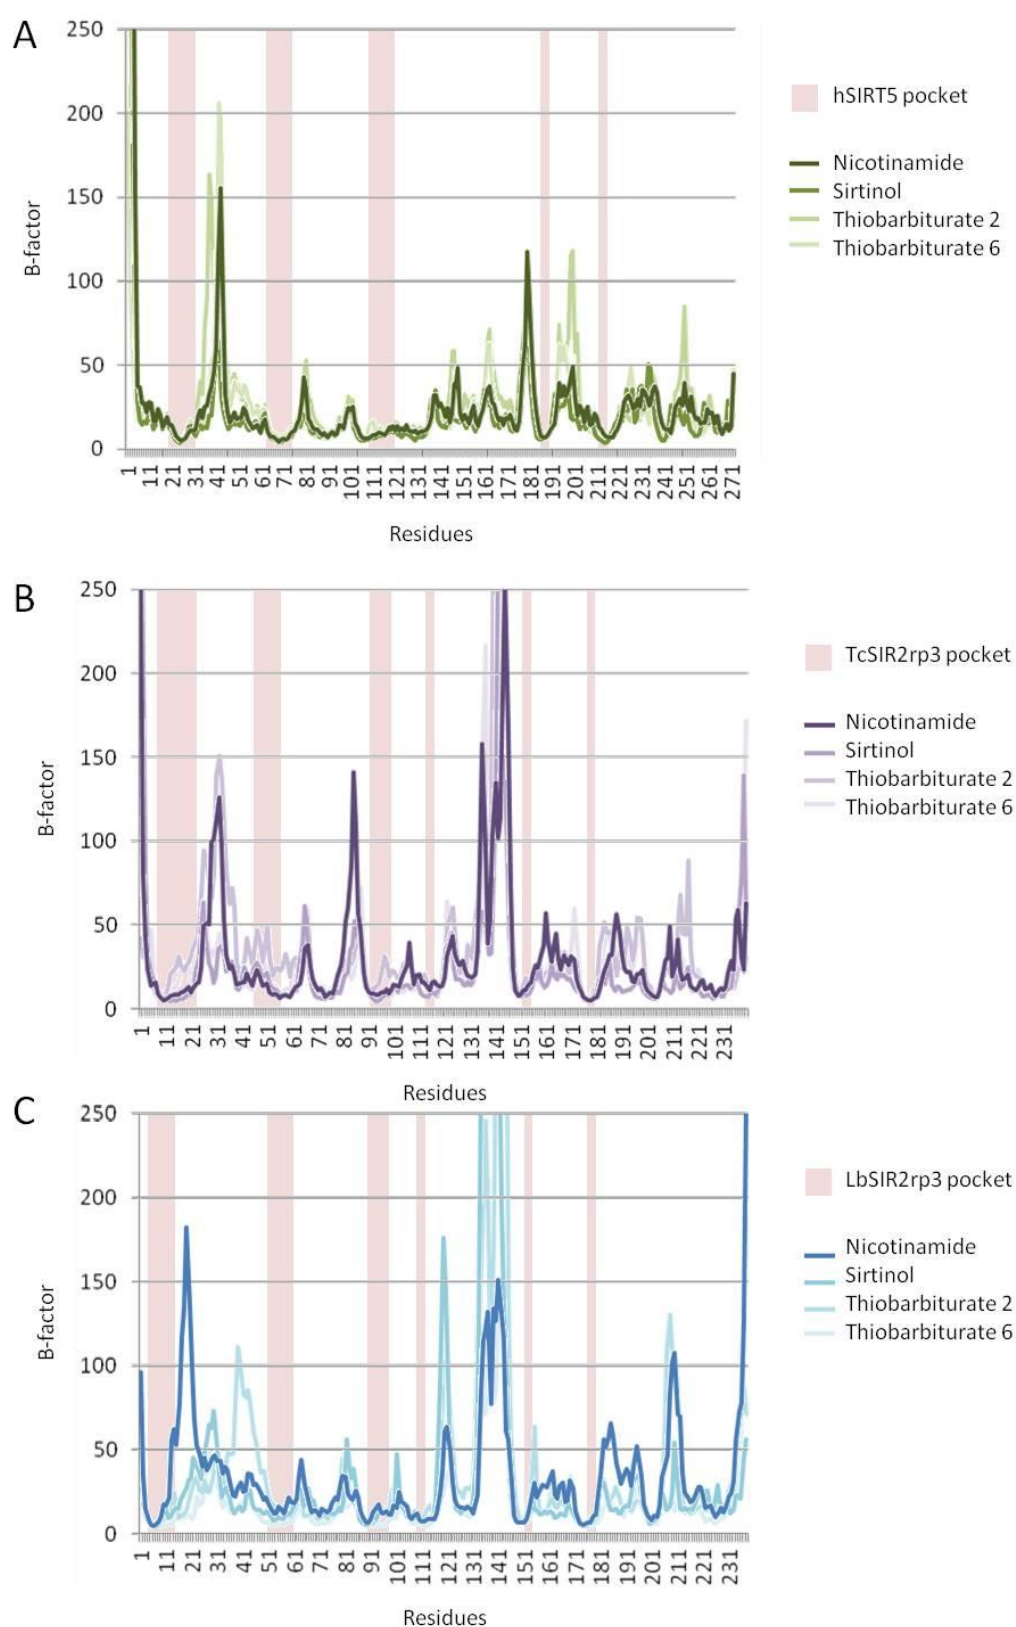

**Figure S5.** Theoretical B-factors (backbone atoms) of hSIRT5 (A), *TcSIR2rp3* (B), *LbSIR2rp3* (C) in complex with Nicotinamide, Sirtinol, Thiobarbiturate compound 2 and 6. B-factor values associated to binding site residues are shaded in light pink.



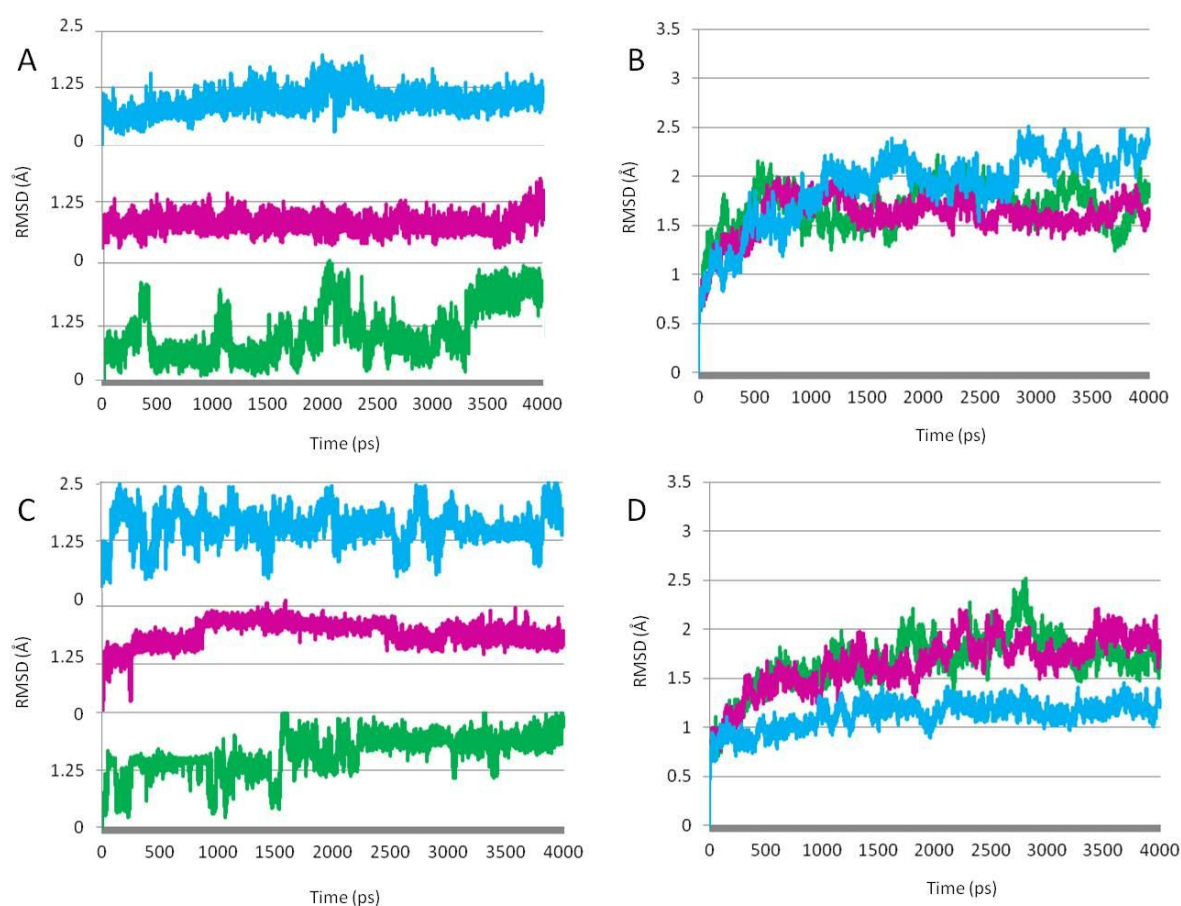

**Figure S6.** RMSD plots against time calculated for the atoms belonging to: Sirtinol (A); Thiobarbiturate compound 6 (B); backbone atoms of the proteins in complex with Sirtinol (C) and with Thiobarbiturate compound 6 (D). hSIRT5, *TcSIR2rp3* and *LbSIR2rp3* are colored in green, magenta and cyan, respectively.

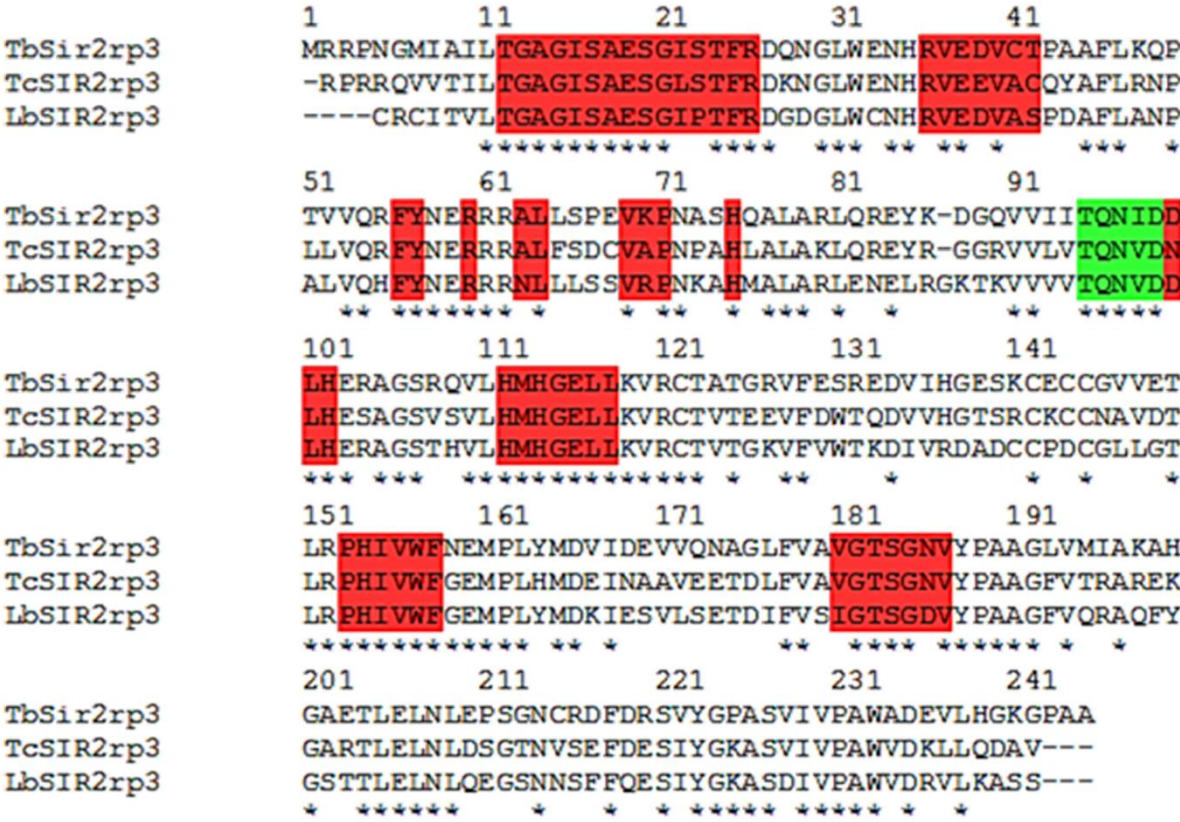

**Figure S7** Multiple sequence alignment between TcSir2rp3, LbSir2rp3, and TbSir2rp3. Amino acids in a 10 Å sphere radius around the ligand are shaded in red whereas the nicotinamide recognition sequence is shaded in green. Identity between amino acids is marked with an asterisk.



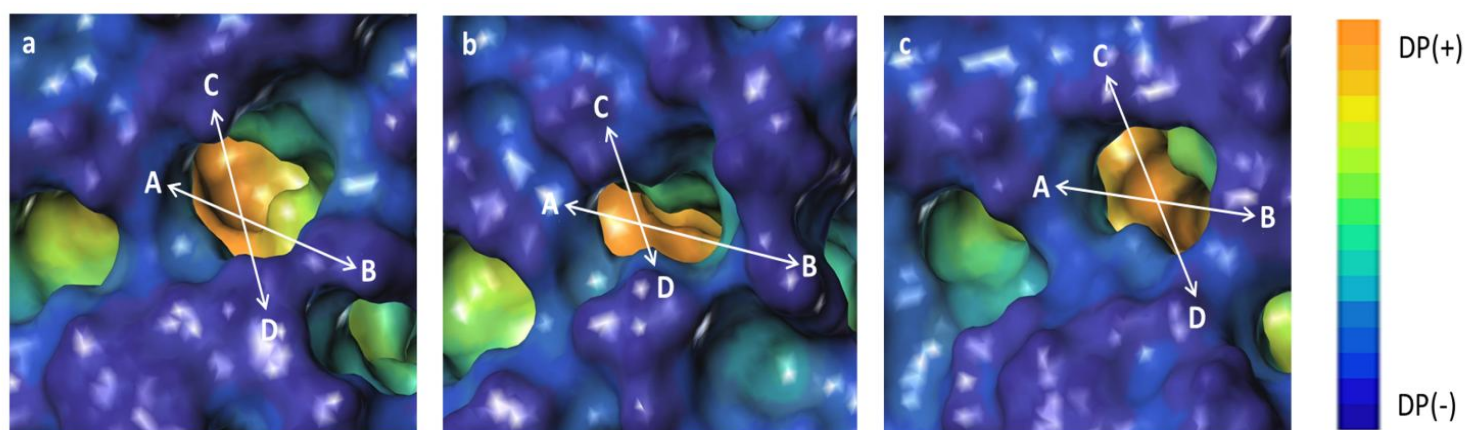

**Figure S8.** Cavity depth properties calculated on hSIRT5 (a), *Tc*SIR2rp3 (b) and *Lb*SIR2rp3 (c) solvent accessible surfaces. Surfaces are colored from blue (low depth, outside of the protein, DP(-)) to orange (high depth, cavities deep inside the protein, DP(+)). The white arrows delimit the channel rim of each protein, characterized by four regions named A, B, C and D.

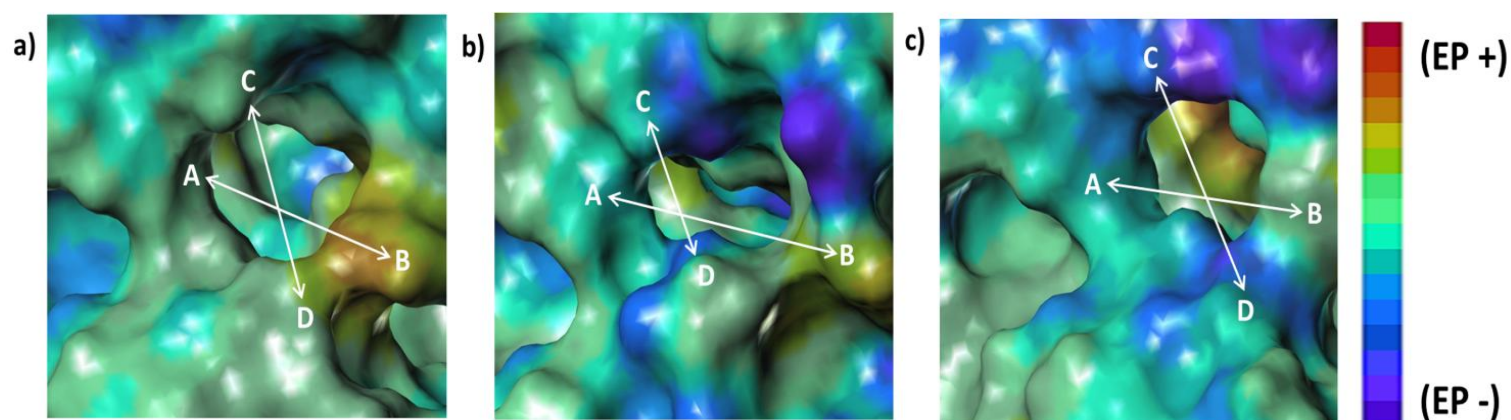

**Figure S9.** Electropotential calculated on hSIRT5 (a), *TcSIR2rp3* (b) and *LbSIR2rp3* (c) solvent accessible surfaces. Surfaces are colored from blue (negative region of the protein) to red (Positive region of the protein). The white arrows delimit the channel rim of each protein, characterized by four regions named A, B, C and D.

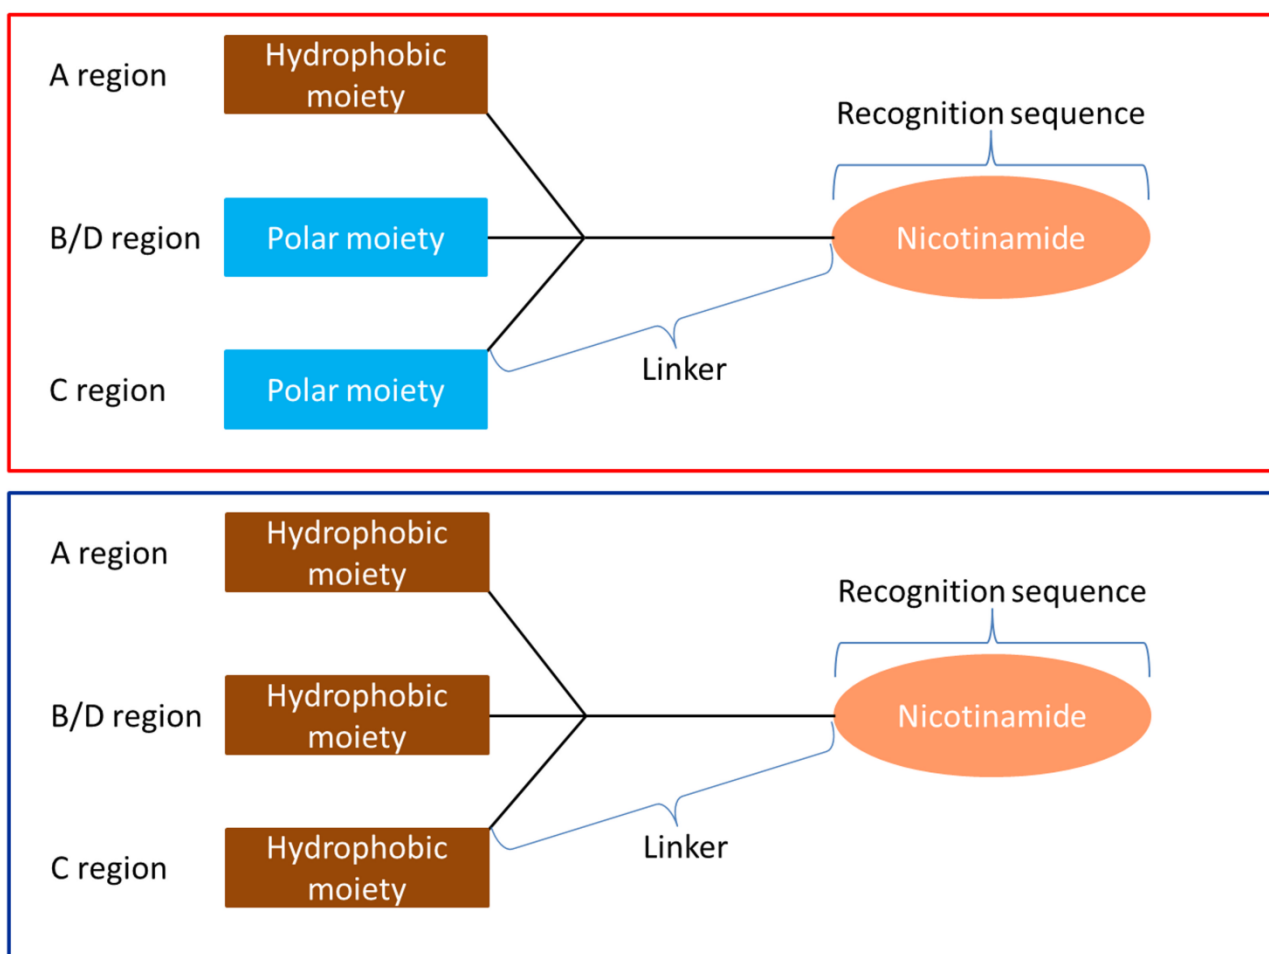

**Fig. S10** Qualitative scheme for the design of new selective inhibitors against parasitic SIR2rp3 (red box). Scheme for human SIRT5 is reported in the blue box.

**Table S1.** Residues from hSIRT5, *TcSIR2rp3*, *LbSIR2rp3* involved in hydrogen bonds and Van der Waals interactions with the docked inhibitors.

| <b>Nicotinamide</b>        | <b>hSIRT5</b>                               | <b><i>TcSIR2rp3</i></b>                    | <b><i>LbSIR2rp3</i></b>                    |
|----------------------------|---------------------------------------------|--------------------------------------------|--------------------------------------------|
| Hydrogen bonds             | Ile112<br>Asp113                            | Val96<br>Asp97                             | Val96<br>Asp95                             |
| Van der Waals interactions | Phe40<br>Ile112<br>Ala29                    | Phe24<br>Val96<br>Ala13                    | Phe21<br>Val94<br>Ala10                    |
| <b>Sirtinol</b>            | <b>hSIRT5</b>                               | <b><i>TcSIR2rp3</i></b>                    | <b><i>LbSIR2rp3</i></b>                    |
| Van der Waals interactions | Ile112<br>Ala29<br>Phe40<br>Gly30<br>Gly219 | Val96<br>Ala13<br>Phe24<br>Gly14<br>Gly180 | Val94<br>Ala10<br>Phe21<br>Gly11<br>Gly178 |
| <b>Thiobarbiturate 2</b>   | <b>hSIRT5</b>                               | <b><i>TcSIR2rp3</i></b>                    | <b><i>LbSIR2rp3</i></b>                    |
| Hydrogen bonds             | Arg75<br>Tyr72                              | Arg59<br>Tyr56                             | Arg56<br>Tyr53                             |
| Van der Waals interactions | Phe193<br>His128                            | Phe156<br>His112                           | Phe154<br>His110                           |
| <b>Thiobarbiturate 6</b>   | <b>hSIRT5</b>                               | <b><i>TcSIR2rp3</i></b>                    | <b><i>LbSIR2rp3</i></b>                    |
| Hydrogen bonds             | Arg75<br>Tyr72                              | Arg59<br>Tyr56                             | Arg56<br>Tyr53                             |
| Van der Waals interactions | Phe193<br>His128                            | Phe156<br>His112                           | Phe154<br>His110                           |

**Table S2.** Details on the systems submitted to molecular dynamics MD simulations.

|                                            |                                              |                   |                   |                   |
|--------------------------------------------|----------------------------------------------|-------------------|-------------------|-------------------|
|                                            | <b>Solvated system<br/>(number of atoms)</b> | 42235             | 39794             | 35402             |
|                                            |                                              | <b>hSIRT5</b>     | <b>TcSir2rp3</b>  | <b>LbSIR2rp3</b>  |
|                                            | <b>Residues Number</b>                       | 273               | 241               | 239               |
|                                            | <b>Added ions</b>                            | 3 Cl <sup>-</sup> | 4 Na <sup>+</sup> | 4 Na <sup>+</sup> |
| <b>Nicotinamide - protein complex</b>      | <b>Waters<br/>(number of residues)</b>       | 12838             | 11907             | 9839              |
|                                            | <b>Solvated system<br/>(number of atoms)</b> | 42666             | 39476             | 33212             |
| <b>Sirtinol - protein complex</b>          | <b>Waters<br/>(number of residues)</b>       | 12970             | 11979             | 9768              |
|                                            | <b>Solvated system<br/>(number of atoms)</b> | 43094             | 39729             | 33036             |
| <b>Thiobarbiturate 2 - protein complex</b> | <b>Waters<br/>(number of residues)</b>       | 12851             | 11958             | 10648             |
|                                            | <b>Solvated system<br/>(number of atoms)</b> | 42729             | 39652             | 35662             |
| <b>Thiobarbiturate 6 - protein complex</b> | <b>Waters<br/>(number of residues)</b>       | 12683             | 12002             | 10558             |



**Table S3.** RMSD values (Å) and standard deviations (in brackets), calculated along 4ns MD simulations.

|                        | <b>hSIRT5</b> | <b>TcSIR2rp3</b> | <b>LbSIR2rp3</b> |
|------------------------|---------------|------------------|------------------|
| Nicotinamide (N)       | 0.2 (0.04)    | 0.2 (0.03)       | 0.2 (0.04)       |
| Backbone (N complex)   | 1.7 (0.3)     | 1.6 (0.3)        | 1.6 (0.3)        |
| Sirtinol (S)           | 1.1 (0.5)     | 0.8 (0.2)        | 1.0 (0.2)        |
| Backbone (S complex)   | 1.7 (0.3)     | 1.6 (0.3)        | 1.7 (0.3)        |
| Thiobarbiturate 2 (T2) | 0.7 (0.2)     | 1.0 (0.2)        | 1.0 (0.2)        |
| Backbone (T2 complex)  | 2.0 (0.5)     | 2.0 (0.5)        | 1.9 (0.4)        |
| Thiobarbiturate 6 (T6) | 1.6 (0.4)     | 1.9 (0.3)        | 1.6 (0.4)        |
| Backbone (T6 complex)  | 1.7 (0.3)     | 1.7 (0.3)        | 1.1 (0.1)        |

**Table S4.** Identity and similarity between the template (PDB code 1S5P), hSIRT5, the modelled *TcSIR2rp3*, *LbSIR2rp3* and *TbSIR2rp3* sequences and the parasitic sequences encoded by the *SIR2rp1* genes.

|                         |                         | <b>Identity (%)</b> | <b>Similarity (%)</b> |
|-------------------------|-------------------------|---------------------|-----------------------|
| <b>1S5P</b>             | <b><i>TcSIR2rp3</i></b> | 59                  | 72                    |
|                         | <b><i>LbSIR2rp3</i></b> | 57                  | 73                    |
| <b>hSIRT5</b>           | <b><i>TcSIR2rp3</i></b> | 35                  | 50                    |
|                         | <b><i>LbSIR2rp3</i></b> | 36                  | 53                    |
| <b><i>TcSIR2rp3</i></b> | <b>1S5P</b>             | 27                  | 45                    |
|                         | <b>hSIRT5</b>           | 32                  | 45                    |
|                         | <b><i>TcSIR2rp3</i></b> | 28                  | 43                    |
| <b><i>LbSIR2rp1</i></b> | <b>1S5P</b>             | 26                  | 37                    |
|                         | <b>hSIRT5</b>           | 29                  | 40                    |
|                         | <b><i>LbSIR2rp3</i></b> | 27                  | 37                    |
| <b><i>TbSIR2rp3</i></b> | <b>hSIRT5</b>           | 40                  | 51                    |
|                         | <b><i>TcSIR2rp3</i></b> | 64                  | 78                    |
|                         | <b><i>LbSIR2rp3</i></b> | 58                  | 74                    |

**Table S5.** Summary of the residues characterizing the A-C pockets of hSIRT5, *Tc*SIR2rp3, *Lb*SIR2rp3 and *Tb*SIR2rp3. Residues potentially interacting with nicotinamide, also used in MD analyses, are reported.

|                                                    | <b>hSIRT5</b> | <b><i>Tc</i>SIR2rp3</b> | <b><i>Lb</i>SIR2rp3</b> | <b><i>Tb</i>SIR2rp3</b> |
|----------------------------------------------------|---------------|-------------------------|-------------------------|-------------------------|
| <b>Pocket A</b>                                    | Gly60         | Gly15                   | Gly15                   | Gly15                   |
|                                                    | Arg71         | Arg26                   | Arg25                   | Arg26                   |
|                                                    | Gly249        | Gly181                  | Gly181                  | Gly181                  |
|                                                    | Ala272        | Leu204                  | Leu204                  | Leu204                  |
|                                                    | Glu273        | Glu205                  | Glu205                  | Glu205                  |
|                                                    | Phe274        | Leu206                  | Leu206                  | Leu206                  |
|                                                    | Cys293        | Ala225                  | Ala225                  | Ala225                  |
|                                                    | Gly294        | Ser226                  | Ser226                  | Ser226                  |
| <b>Pocket B</b>                                    | His158        | His113                  | His 113                 | His113                  |
|                                                    | Gln140        | Gln95                   | Gln95                   | Gln95                   |
| <b>Pocket C</b>                                    | Gly58         | Gly13                   | Gly12                   | Gly13                   |
|                                                    | Ala59         | Ala14                   | Ala13                   | Ala14                   |
|                                                    | Gly60         | Gly15                   | Gly14                   | Gly15                   |
|                                                    | Val61         | Ile16                   | Ile15                   | Ile16                   |
|                                                    | Ser62         | Ser17                   | Ser16                   | Ser17                   |
|                                                    | Gly66         | Gly21                   | Gly20                   | Gly21                   |
|                                                    | Val67         | Leu22                   | Ile21                   | Ile22                   |
|                                                    | Pro68         | Ser23                   | Pro22                   | Ser23                   |
|                                                    | Thr69         | Thr24                   | Thr23                   | Thr24                   |
|                                                    | Phe70         | Phe25                   | Phe24                   | Phe25                   |
|                                                    | His118        | His75                   | His74                   | His75                   |
|                                                    | Thr139        | Thr94                   | Thr94                   | Thr94                   |
|                                                    | Gln140        | Gln95                   | Gln95                   | Gln95                   |
|                                                    | Asn141        | Asn96                   | Asn96                   | Asn96                   |
|                                                    | Ile142        | Val97                   | Val97                   | Val97                   |
|                                                    | Asp143        | Asp98                   | Asp98                   | Asp98                   |
|                                                    | Leu145        | Leu100                  | Leu100                  | Leu100                  |
| <b>Amino acid residues 6 Å around nicotinamide</b> | Gly58         | Gly13                   | Gly12                   | Gly13                   |
|                                                    | Ala59         | Ala14                   | Ala13                   | Ala14                   |
|                                                    | Ser62         | Ser17                   | Ser16                   | Ser17                   |
|                                                    | Ala63         | Ala18                   | Ala17                   | Ala18                   |
|                                                    | Val67         | Leu22                   | Ile21                   | Ile22                   |
|                                                    | Pro68         | Ser23                   | Pro22                   | Ser23                   |
|                                                    | Thr69         | Thr24                   | Thr23                   | Thr24                   |
|                                                    | Phe70         | Phe25                   | Phe24                   | Phe25                   |
|                                                    | Arg105        | Arg60                   | Arg59                   | Arg60                   |
|                                                    | Gln140        | Gln95                   | Gln95                   | Gln95                   |
|                                                    | Asn141        | Asn96                   | Asn96                   | Asn96                   |
|                                                    | Ile142        | Val97                   | Val97                   | Val97                   |
|                                                    | Asp143        | Asp98                   | Asp98                   | Asp98                   |
|                                                    | Glu144        | Asp99                   | Asp99                   | Asp99                   |
|                                                    | Leu145        | Leu100                  | Leu100                  | Leu100                  |
|                                                    | Leu161        | Leu116                  | Leu116                  | Leu116                  |

**Table S6.** Definition of the A-D areas characterizing the catalytic rims of hSIRT5, TcSIR2rp3 and LbSIR2rp3.

|                                     | <b>hSIRT5</b>       | <b>TcSIR2rp3</b>    | <b>LbSIR2rp3</b>    |
|-------------------------------------|---------------------|---------------------|---------------------|
| <b>Area A</b>                       | C $\zeta$ Phe223    | C $\zeta$ Phe157    | C $\zeta$ Phe157    |
| <b>Area B</b>                       | C $\zeta$ Arg71     | C $\zeta$ Arg26     | C $\zeta$ Arg25     |
| <b>Distance Area A - Area B (Å)</b> | 10.7                | 11.7                | 10.7                |
| <b>Area C</b>                       | C $\gamma$ Gln83    | C $\gamma$ Glu38    | C $\gamma$ Glu37    |
| <b>Area D</b>                       | C $\gamma$ 2 Val253 | O $\delta$ 1 Asn185 | O $\delta$ 1 Asp185 |
| <b>Distance Area C – Area D (Å)</b> | 8.5                 | 6.0                 | 8.9                 |

**Table S7.** Amino acids belonging to the four regions (A-D) of the rim channel of hSIRT5, TcSIR2rp3 and LbSIR2rp3 proteins. Punctual differences are highlighted in bold.

|          | <b>hSIRT5</b> | <b>TcSIR2rp3</b> | <b>LbSIR2rp3</b> |
|----------|---------------|------------------|------------------|
| <b>A</b> | His158        | His113           | His113           |
|          | Val220        | Ile154           | Ile154           |
|          | Val221        | Val155           | Val155           |
|          | Phe223        | Phe157           | Phe157           |
|          | <b>Leu227</b> | Pro161           | Pro161           |
|          | Val254        | Val186           | Val186           |
|          | Pro256        | Pro188           | Pro188           |
|          |               |                  |                  |
| <b>B</b> | Thr69         | Thr24            | Thr23            |
|          | Arg71         | Arg26            | Arg25            |
|          | <b>Gly72</b>  | Asp27            | Asp26            |
|          | Ser251        | Ser183           | Ser183           |
|          | Glu277        | <b>Asp209</b>    | Gln209           |
|          |               |                  |                  |
| <b>C</b> | <b>Gly72</b>  | Asp27            | Asp26            |
|          | <b>Ala73</b>  | <b>Lys28</b>     | <b>Gly27</b>     |
|          | <b>Gln81</b>  | Arg36            | Arg36            |
|          | <b>Gln38</b>  | Glu38            | Glu38            |
|          |               |                  |                  |
| <b>D</b> | Ser251        | Ser183           | Ser183           |
|          | <b>Val253</b> | Asn185           | Asn185           |
